# Supplementary material for: CST6 protein and peptides inhibit breast cancer bone metastasis by suppressing CTSB activity and osteoclastogenesis
Source: PubMed Central journal article supplement (PMC8581426; doi:10.7150/thno.62187), 2021-10-11
Supplement: thnov11p9821s1.pdf [file thnov11p9821s1.pdf]

## Supplementary Information

Supplementary Information contains 6 Supplementary Figures and 5 Supplementary Tables. In addition, uncropped images of all Western blots in the figures were attached as Supplementary Fig. 7.

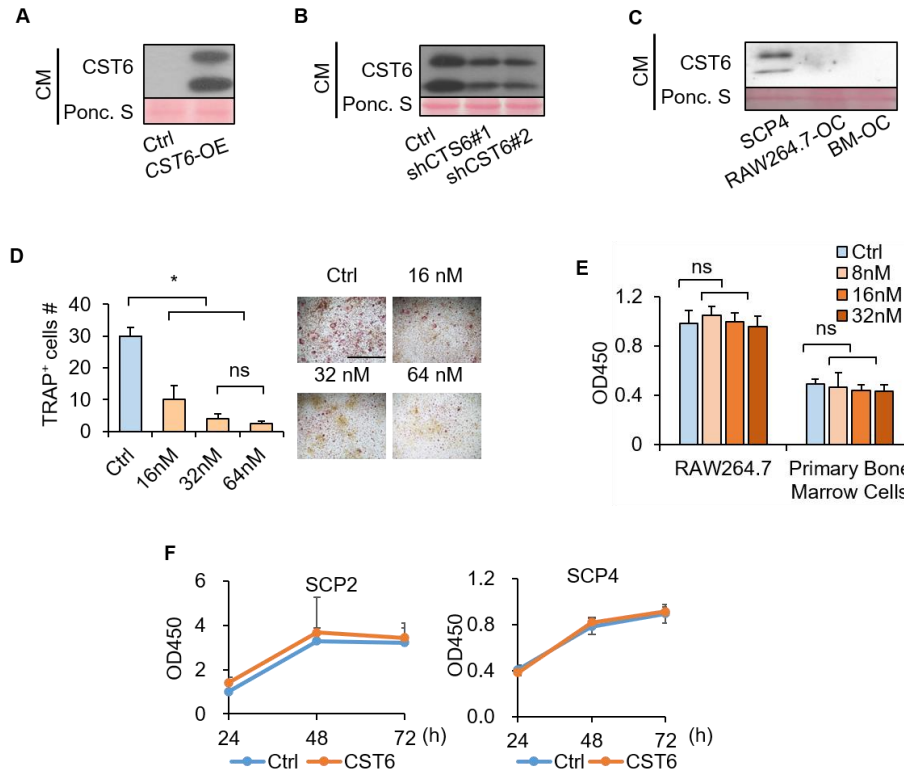

### Supplementary Figure 1. The effects of CST6 on osteoclasts and tumor cells.

(A) CST6 secretion level in SCP2 cells after overexpression. Note that the two bands of CST6 represent the glycosylated (17 kDa) and unglycosylated (14.4 kDa) forms. Ponc. S, Ponceau S. (B) CST6 secretion level in SCP4 cells after knockdown. (C) Western blot analysis of secreted CST6 in SCP4 and RAW264.7 or primary bone marrow (BM)-derived osteoclasts (OC). (D) Osteoclastogenesis of murine primary bone marrow cells with different concentrations of recombinant CST6 protein (n = 3 independent experiments). Scale bar, 200  $\mu$ m. (E) Viability of RAW264.7 or primary bone marrow-derived osteoclasts after CST6 recombinant protein treatment (n = 4 independent experiments). (F) SCP2/SCP4 tumor cell growth after CST6 recombinant protein treatment (32 nM); n = 4 biological repeats.

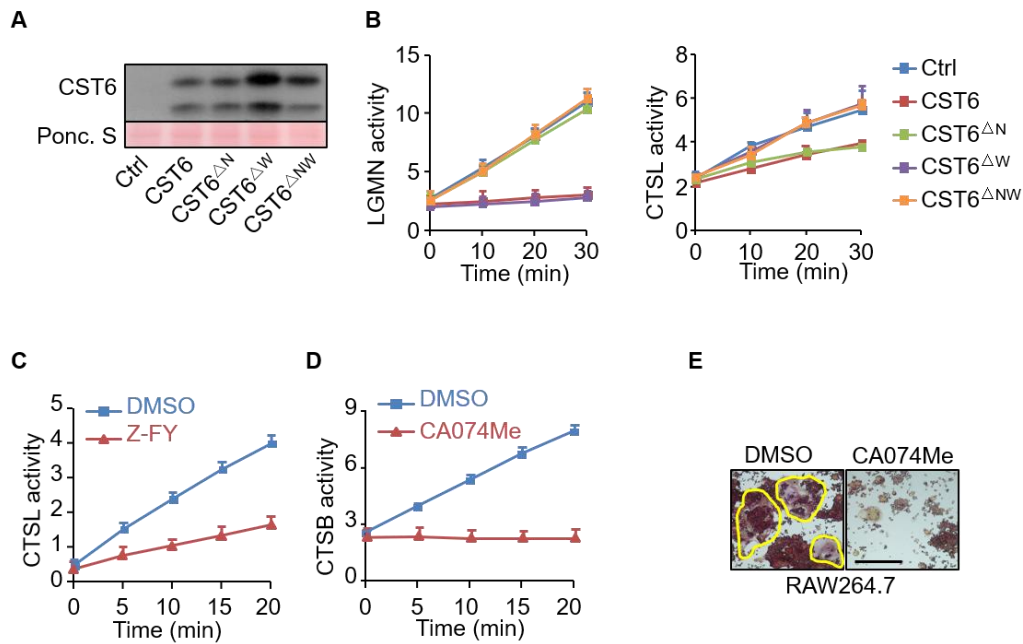

**Supplementary Figure 2. The effects of CST6 mutants and cathepsin inhibitors on enzymatic activities of LGMN, CTSL and CTSB.**

(A) Western blot analysis of secreted CST6 mutants in SCP2 after overexpression. (B) LGMN and CTSL enzymatic activity assay in SCP2 after CST6 mutant overexpression. (C) CTSL enzymatic activity assay of RAW264.7 after treatment with 10  $\mu$ M Z-FY(t-Bu)-DMK (Z-FY). (D) CTSB enzymatic activity assay in RAW264.7 after treatment with 10  $\mu$ M CA-074Me. (E) Representative images of RAW264.7 osteoclastogenesis after treatment with CA074Me. Yellow circles denote mature osteoclasts.

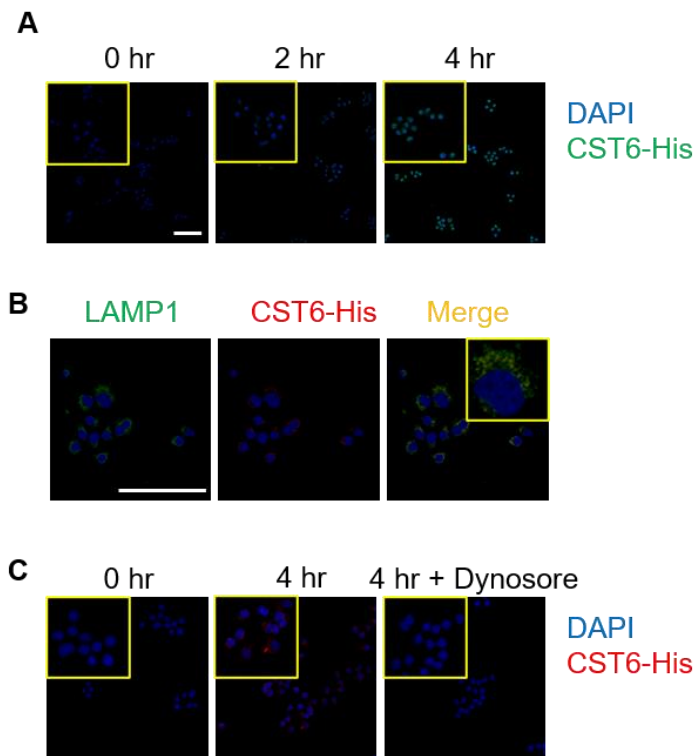

**Supplementary Figure 3. Immunofluorescent (IF) analyses of internalized CST6 protein in primary bone marrow-derived osteoclasts.**

(A) IF of CST6 in osteoclasts after culturing osteoclasts with 32 nM His-tagged recombinant CST6 protein for various time. (B) IF of intracellular CST6-His and the lysosome marker LAMP1 after culturing osteoclasts with 32 nM CST6-His protein. (C) IF of recombinant CST6-His in osteoclasts after culturing osteoclasts with CST6-His and Dynosore (30  $\mu$ M). Scale bar, 150  $\mu$ m.



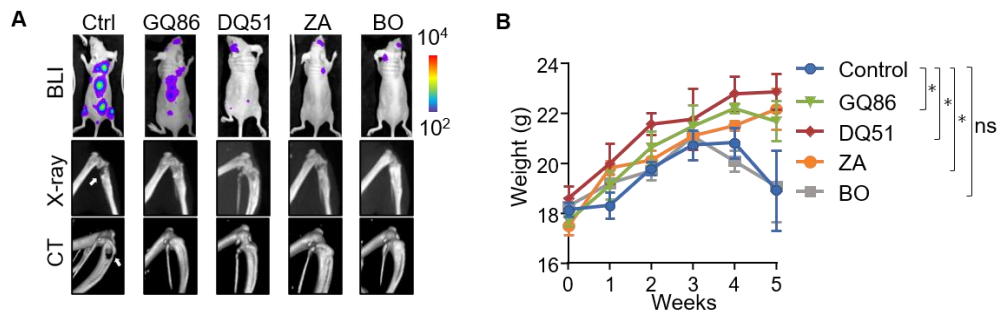

**Supplementary Figure 5. The effects of CST6 peptides and clinical drugs to inhibit *in vivo* bone metastasis.**

**(A)** SCP2 bone metastasis in nude mice with treatment of 1 mg/kg/day CST6 peptides, 1 mg/kg/day Zoledronic Acid (ZA) or 1 mg/kg/day Bortezomib (BO). Shown are representative BLI, X-ray and micro-CT images at week 4 of treatment. **(B)** Body weights of the mice at week 5.

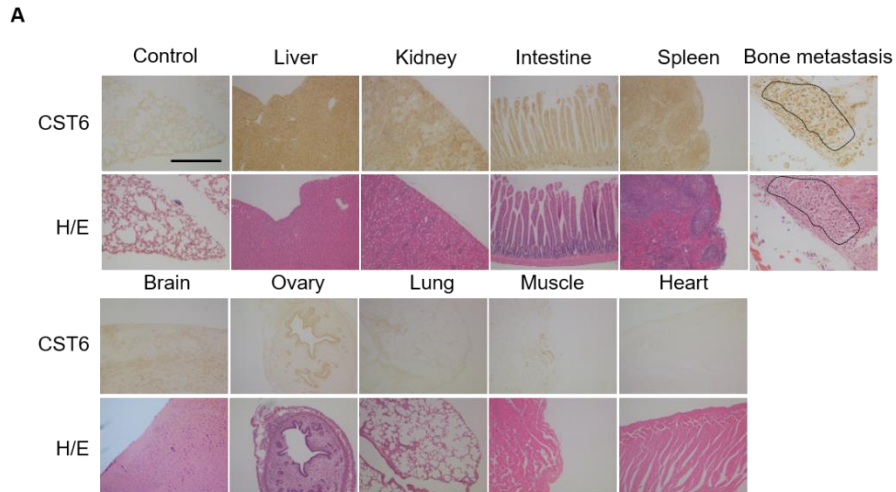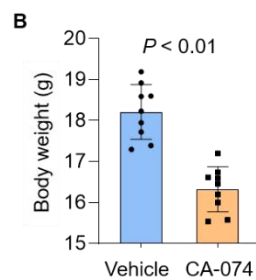

**Supplementary Figure 6. Pharmacological evaluation of CST6 recombinant protein and CA-074.**

(A) CST6 immunohistochemistry in various organs at week 5 after administration of 1 mg/kg/day CST6 peptides. The lung section from un-treated mice was used as negative control of the assay. Dotted lines denotes areas of bone metastasis. Scale bar, 150  $\mu$ m. (B) The body weights of nude mice after treatment of 10 mg/kg CA-074 for 8 consecutive days (n = 9 mice per groups).

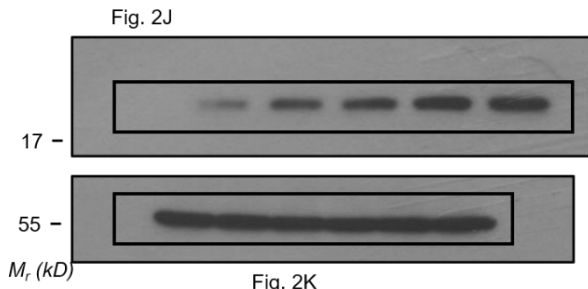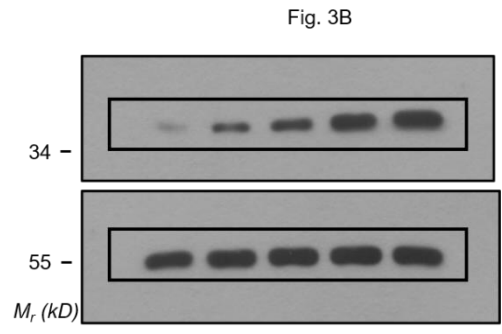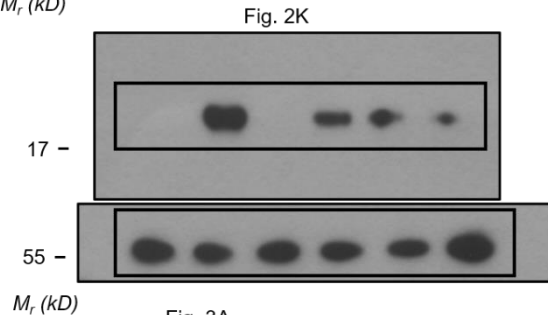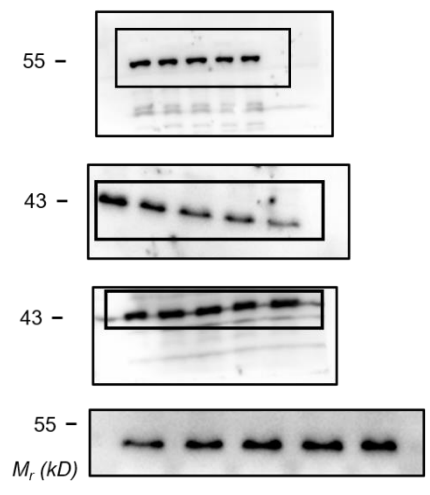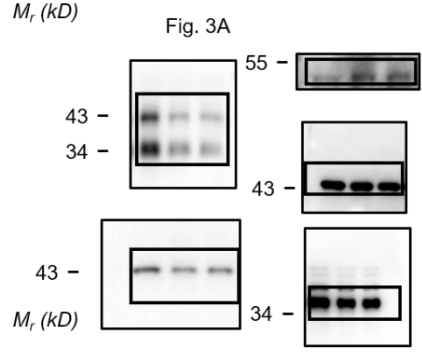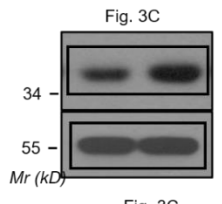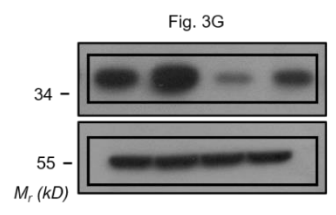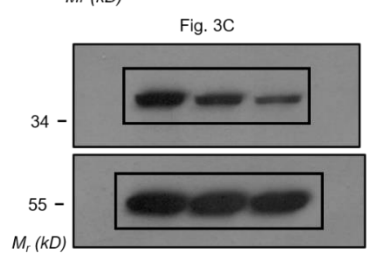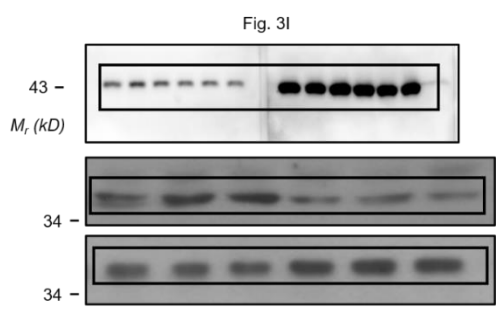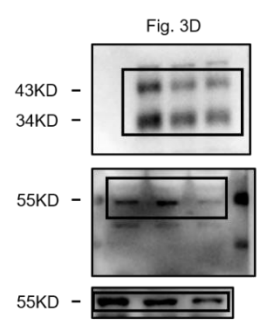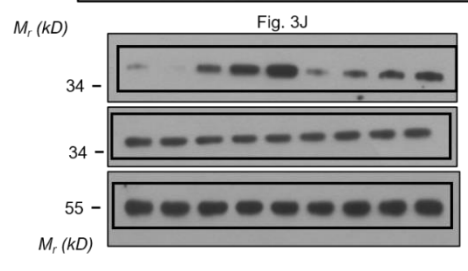

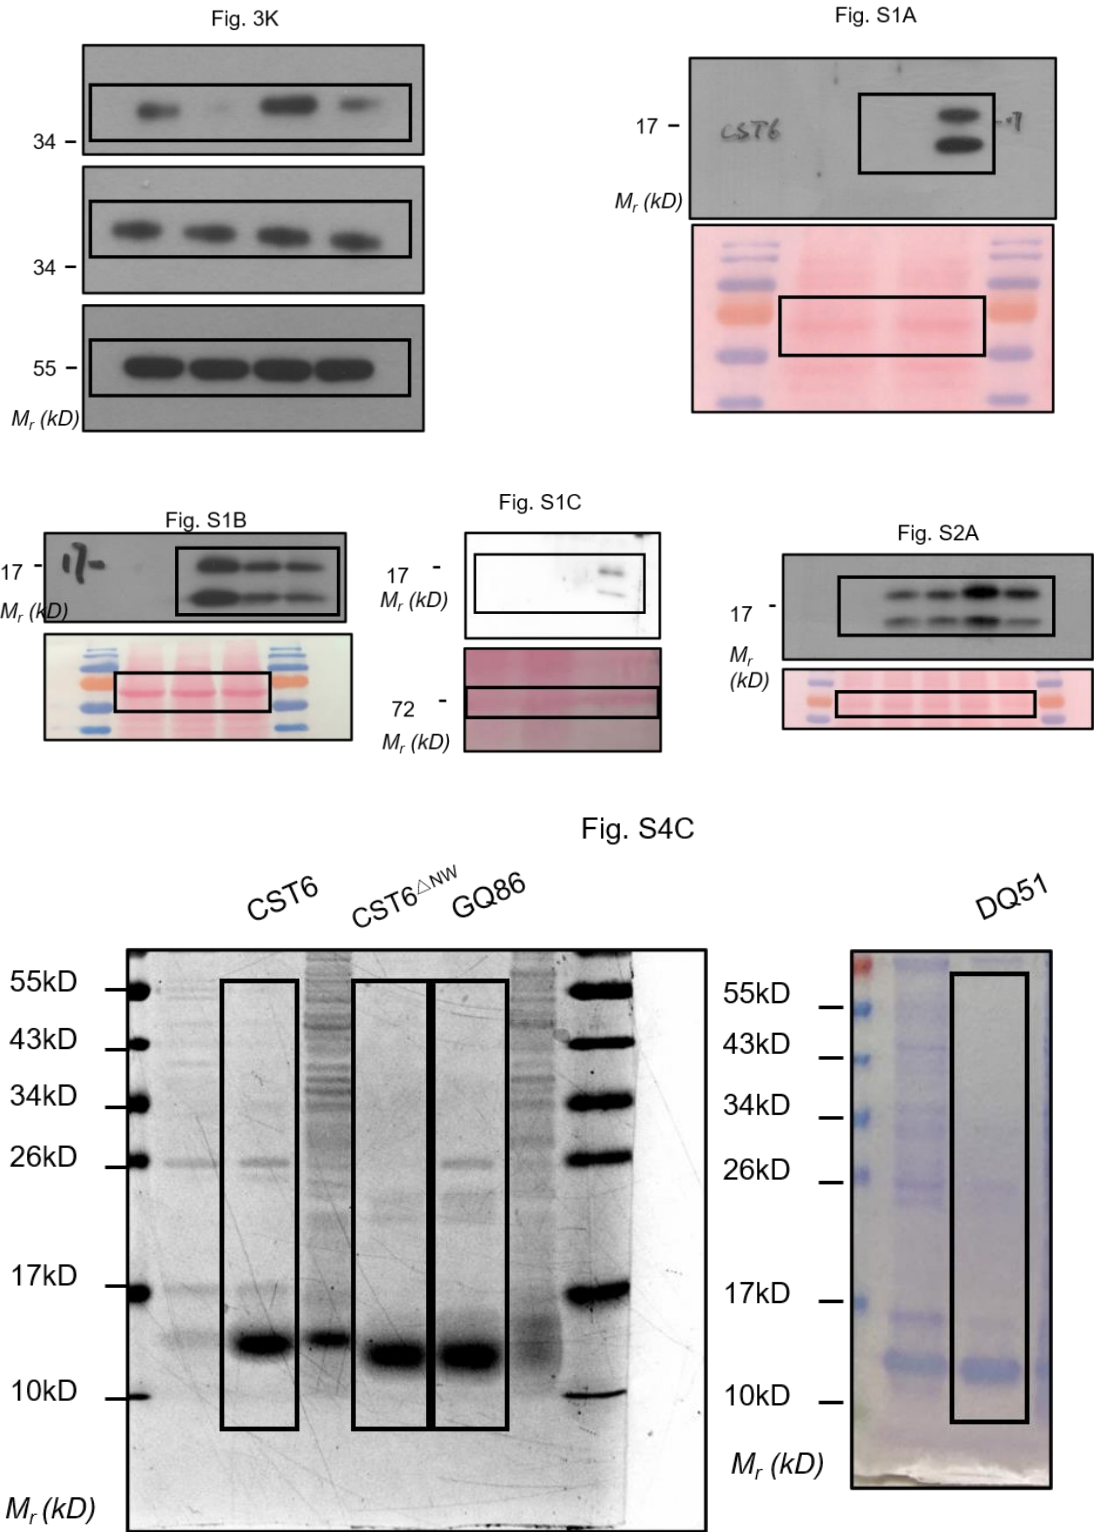

**Supplementary Figure 7. Uncropped images of Western blots.**



## Supplementary Tables:

**Table S1. Amino acid sequences of CST6-related peptides.**

| Name                | Length | Sequence                                                                                                                                                      |
|---------------------|--------|---------------------------------------------------------------------------------------------------------------------------------------------------------------|
| CST6                | 149    | MARSNLPLALGLALVAFCLLALPRDARARPQERMVGELRDLSPDDPQVQKAAQAAVASYNM<br>GSNSIYYFRDTHIIKAQSQLVAGIKYFLTMEMGSTDCRKTRVTGDHVDLTTCPAAGAQQEKL<br>RCDFEVLVVPWQNSSQLLKHNCVQM  |
| CST6 <sup>ΔN</sup>  | 149    | MARSNLPLALGLALVAFCLLALPRDARARPQERMVGELRDLSPDDPQVQKAAQAAVASYNM<br>GSASIIYYFRDTHIIKAQSQLVAGIKYFLTMEMGSTDCRKTRVTGDHVDLTTCPAAGAQQEKL<br>RCDFEVLVVPWQNSSQLLKHNCVQM |
| CST6 <sup>ΔW</sup>  | 149    | MARSNLPLALGLALVAFCLLALPRDARARPQERMVGELRDLSPDDPQVQKAAQAAVASYNM<br>GSNSIYYFRDTHIIKAQSQLVAGIKYFLTMEMGSTDCRKTRVTGDHVDLTTCPAAGAQQEKL<br>RCDFEVLVVPWQNSSQLLKHNCVQM  |
| CST6 <sup>ΔNW</sup> | 149    | MARSNLPLALGLALVAFCLLALPRDARARPQERMVGELRDLSPDDPQVQKAAQAAVASYNM<br>GSASIIYYFRDTHIIKAQSQLVAGIKYFLTMEMGSTDCRKTRVTGDHVDLTTCPAAGAQQEKL<br>RCDFEVLVVPWQNSSQLLKHNCVQM |
| GQ86                | 86     | GELRDLSPDDPQVQKAAQAAVASYNMGSNSIYYFRDTHIIKAQSQLVAGIKYFLTMEMGST<br>CRKTRVTGDHVDLTTCPAAGAQQ                                                                      |
| MS79                | 79     | MARSNLPLALGLALVAFCLLALPRDARARPQERMVGELRDLSPDDPQVQKAAQAAVASYNM<br>GSNSIYYFRDTHIIKAQS                                                                           |
| DQ51                | 51     | DTHIIKAQSQLVAGIKYFLTMEMGSTDCRKTRVTGDHVDLTTCPAAGAQQ                                                                                                            |
| GM30                | 30     | GSNSIYYFRDTHIIKAQSQLVAGIKYFLTM                                                                                                                                |
| AY11                | 11     | AQSQLVAGIKY                                                                                                                                                   |
| DR9                 | 9      | DARARPQER                                                                                                                                                     |

**Table S2. Circulation half-lives of CST6 peptides in mice.**

| Group (n=4) | Model           | Half-life (min) | 95% confidence intervals (min) |
|-------------|-----------------|-----------------|--------------------------------|
| CST6        | One-phase decay | 10.48           | 8.23-14.38                     |
| GQ86        | One-phase decay | 20.58           | 13.14-33.91                    |
| DQ51        | One-phase decay | 62.75           | 47.72-168.20                   |

**Table S3. LD50 and MTD of CST6 peptides in mice.**

| Protein/Peptide | LD50 (mg/kg)  | MTD (mg/kg) |
|-----------------|---------------|-------------|
| CST6            | 322.00±117.10 | 200         |
| GQ86            | 377.70±146.05 | 200         |
| DQ51            | 360.10±74.25  | 250         |

**Table S4. Organ weight measurements for chronic toxicity analysis.**

| Group (n=4)   |                                  | Mock        | Ctrl        | CST6        | GQ86        | DQ51        |
|---------------|----------------------------------|-------------|-------------|-------------|-------------|-------------|
| Heart         | Weight (g)                       | 0.125±0.025 | 0.128±0.013 | 0.123±0.010 | 0.125±0.006 | 0.130±0.014 |
|               | <i>p</i> -value compared to Ctrl | 0.865       | -           | 0.550       | 0.730       | 0.800       |
| Liver         | Weight (g)                       | 1.028±0.093 | 1.155±0.237 | 1.065±0.298 | 1.098±0.114 | 1.230±0.057 |
|               | <i>p</i> -value compared to Ctrl | 0.355       | -           | 0.653       | 0.677       | 0.561       |
| Spleen        | Weight (g)                       | 0.108±0.01  | 0.105±0.026 | 0.110±0.024 | 0.123±0.015 | 0.135±0.019 |
|               | <i>p</i> -value compared to Ctrl | 0.865       | -           | 0.791       | 0.294       | 0.116       |
| Lung          | Weight (g)                       | 0.195±0.076 | 0.140±0.014 | 0.145±0.021 | 0.140±0.017 | 0.155±0.035 |
|               | <i>p</i> -value compared to Ctrl | 0.204       | -           | 0.705       | 0.999       | 0.458       |
| Kidney        | Weight (g)                       | 0.285±0.041 | 0.248±0.028 | 0.288±0.052 | 0.287±0.023 | 0.288±0.026 |
|               | <i>p</i> -value compared to Ctrl | 0.181       | -           | 0.222       | 0.104       | 0.080       |
| Adrenal Gland | Weight (g)                       | 0.011±0.001 | 0.028±0.017 | 0.055±0.070 | 0.011±0.001 | 0.018±0.010 |
|               | <i>p</i> -value compared to Ctrl | 0.098       | -           | 0.477       | 0.098       | 0.346       |
| Thymus        | Weight (g)                       | 0.053±0.031 | 0.053±0.029 | 0.065±0.010 | 0.038±0.028 | 0.028±0.029 |
|               | <i>p</i> -value compared to Ctrl | 0.999       | -           | 0.443       | 0.479       | 0.264       |
| Ovary         | Weight (g)                       | 0.163±0.097 | 0.155±0.137 | 0.238±0.151 | 0.190±0.063 | 0.205±0.151 |
|               | <i>p</i> -value compared to Ctrl | 0.932       | -           | 0.448       | 0.658       | 0.641       |
| Brain         | Weight (g)                       | 0.385±0.054 | 0.398±0.046 | 0.438±0.026 | 0.435±0.007 | 0.403±0.066 |
|               | <i>p</i> -value compared to Ctrl | 0.721       | -           | 0.138       | 0.267       | 0.899       |

**Table S5. Sequences of qPCR primers and shRNA/siRNA constructs.**

|                   | Gene      | Sequence                |
|-------------------|-----------|-------------------------|
| qPCR primers      | Gapdh-F   | TGTCCGTCGTGGATCTGAC     |
|                   | Gapdh-R   | CCTGCTTCACCACCTTCTTG    |
|                   | Calcr-F   | GGTTCCTTCTCGTGAACAGGT   |
|                   | Calcr-R   | GGTAGGAGCCTGAAGAACTGG   |
|                   | Nfatc1-F  | TCCAAAGTCATTTTCGTGGA    |
|                   | Nfatc1-R  | CTTTGCTTCCATCTCCCAGA    |
|                   | Acp5-F    | CGTCTCTGCACAGATTGCAT    |
|                   | Acp5-R    | AAGCGCAAACGGTAGTAAGG    |
|                   | Ctsk-F    | CTCCATCGACTATCGAAAGAAAG |
|                   | Ctsk-R    | AAAGCCCAACAGGAACCCAC    |
|                   | Fos-F     | GGGACAGCCTTTCCTACTACC   |
|                   | Fos-R     | AGATCTGCGCAAAGTCCTG     |
| shRNAs<br>/siRNAs | shCST6#1  | GCTGCGCTGTGACTTTGAGGT   |
|                   | shCST6#2  | CTTCCGAGACACGCACATCAT   |
|                   | shSphk1#1 | CCTTCCAGTTAGAGTAACA     |
|                   | shSphk1#2 | TATGGAACTTGACTGTCCA     |
|                   | siControl | UUCUCCGAACGUGUCACGU     |
|                   | siCtsb#1  | GCUGUCGGAUGACCUGAUU     |
|                   | siCtsb#2  | GGACAUAGAUCUACCUGAA     |
|                   | siSphk1   | GAGGCAGAGAUAACCUUUA     |

## References of Supplementary Information:

1. Dall, E., J.C. Fegg, P. Briza, and H. Brandstetter, Structure and mechanism of an aspartimide-dependent peptide ligase in human legumain. *Angew Chem Int Ed Engl*, 2015. **54**(10): 2917-21.
2. Ni, J., M. Abrahamson, M. Zhang, M.A. Fernandez, A. Grubb, J. Su, et al., Cystatin E is a novel human cysteine proteinase inhibitor with structural resemblance to family 2 cystatins. *J Biol Chem*, 1997. **272**(16): 10853-8.
3. Schuttelkopf, A.W., G. Hamilton, C. Watts, and D.M. van Aalten, Structural basis of reduction-dependent activation of human cystatin F. *J Biol Chem*, 2006. **281**(24): 16570-5.
4. Matsumoto, K., M. Murata, S. Sumiya, K. Mizoue, K. Kitamura, and T. Ishida, X-ray crystal structure of papain complexed with cathepsin B-specific covalent-type inhibitor: substrate specificity and inhibitory activity. *Biochim Biophys Acta*, 1998. **1383**(1): 93-100.
5. Musil, D., D. Zucic, D. Turk, R.A. Engh, I. Mayr, R. Huber, et al., The refined 2.15 Å X-ray crystal structure of human liver cathepsin B: the structural basis for its specificity. *Embo J*, 1991. **10**(9): 2321-30.
6. Martinez, M., M. Diaz-Mendoza, L. Carrillo, and I. Diaz, Carboxy terminal extended phytocystatins are bifunctional inhibitors of papain and legumain cysteine proteinases. *FEBS Lett*, 2007. **581**(16): 2914-8.
